# Supplementary material
Source: MDPI journal article supplement (https://www.mdpi.com/2254-9625/13/1/8)
Supplement: s1 [file s1]

Supplemental Table S1: Overview of the online courses

|                                                                             | Number and Format of Teaching units                                           | Duration min. | Duration max. | Number of tasks           | Number of questions per task | Types of questions                                                                                  | Average Score |
|-----------------------------------------------------------------------------|-------------------------------------------------------------------------------|---------------|---------------|---------------------------|------------------------------|-----------------------------------------------------------------------------------------------------|---------------|
| <b>What is pathology?</b>                                                   | 4 Screencasts                                                                 | 8:23          | 1:11:23       | 4                         | 3-3-2-3                      | MC / Assignment                                                                                     | 1.47          |
| <b>Morphological basics</b>                                                 | 9 Screencasts + Introduction                                                  | 3:40          | 21:14         | 10                        | 1-1-1-2-1-1-1-2-1-2          | MC / Assignment                                                                                     | 1.63          |
| <b>Arteriosclerosis</b>                                                     | 8 (7a + 7b) Lectures                                                          | 4:58          | 16:09         | 7 + PPT slides (homework) | 2-2-2-2-2-2-2                | MC                                                                                                  | 1.28          |
| <b>Inflammation</b>                                                         | 10 Lectures + Introduction                                                    | 15:07         | 52:44         | 8                         | 1-1-2-2-1-6-2-2              | Drag-and-drop /MC                                                                                   | 1.71          |
| <b>Immunology</b>                                                           | 3 Lectures                                                                    | 34:39         | 47:46         | 1                         | 3                            | MC                                                                                                  | 1.56          |
| <b>General tumor pathology</b>                                              | 10 Lectures (mit 5 Themen)                                                    | 5:47          | 10:09         | 5 + PDF slides (homework) | 1-2-2-1-1                    | MC                                                                                                  | 1.41          |
| <b>Immuno-oncology</b>                                                      | 2 Lectures                                                                    | 42:20         | 45:36         | 1                         | 2                            | MC                                                                                                  | 1.25          |
| <b>Gynaecological tumor pathology</b>                                       | 12 Lectures (6 subjects)                                                      | 7:14          | 33:39         | 5 + PDF slides (homework) | 9-6-5-3-4                    | MC                                                                                                  | 1.78          |
| <b>GI Tumor Pathology – GI</b>                                              | 6 Lectures                                                                    | 7:24          | 15:23         | 6 + PDF slides (homework) | 1-1-1-1-1-1                  | MC                                                                                                  | 1.35          |
| <b>GI Tumor Pathology – Pancreas</b>                                        | 4 Lectures                                                                    | 7:28          | 27:37         | 3 + PDF slides (homework) | 1-1-1                        | MC                                                                                                  | 1.41          |
| <b>Head and neck tumors</b>                                                 | 3 Lectures Powerpoint                                                         | -             | -             | 3                         | 1-1-1                        | MC                                                                                                  | 2.29          |
| <b>Urological Tumor Pathology I</b>                                         | 3 Lectures Powerpoint with sound (=screencast)                                | -             | -             | none                      | -                            | -                                                                                                   | 1.94          |
| <b>General Neuropathology – Stroke</b>                                      | 5 Screencasts + Welcome (Video) + 1 script (PDF) + 1 case vignette (video)    | 3:44          | 6:05          | 5                         | 3-3-3-3-3                    | MC (+ indication of security in the choice of the answer)                                           | 1.0           |
| <b>General Neuropathology – Craniocerebral Trauma</b>                       | 4 screencasts + 1 script (PDF) + 1 case vignette (video)                      | 4:10          | 6:01          | 4                         | 3-3-3-3                      | MC                                                                                                  | 1.0           |
| <b>General Neuropathology – Infections</b>                                  | 2 screencasts + 1 script (PDF) + 1 case vignette (video)                      | 5:44          | 5:45          | 2                         | 3-3                          | MC                                                                                                  | 1.0           |
| <b>General Neuropathology – Brain tumors</b>                                | 4 screencasts + 1 script (PDF) + 1 case vignette (video)                      | 4:52          | 11:00         | 4                         | 3-3-3-3                      | MC                                                                                                  | 1.0           |
| <b>Special Neuropathology – Maldevelopments and developmental disorders</b> | 6 screencasts + Welcome (Video) + 1 script (PDF) + 1 slide Take Home Messages | 3:36          | 8:20          | 6                         | 1-2-2-1-1-1                  | Drag-and-drop / open question with short answer / cloze text selection / MC / assign correct answer | 1.11          |
| <b>Special Neuropathology – Metabolic disorders</b>                         | 5 screencasts + 1 script (PDF) + 1 slide Take Home Messages                   | 2:04          | 5:42          | 5                         | 1-1-1-1-1                    | Cloze text selection / drag and drop / put terms in a meaningful order                              | 1.20          |

|                                                     |                                                                   |       |       |                           |               |                                                                                            |      |
|-----------------------------------------------------|-------------------------------------------------------------------|-------|-------|---------------------------|---------------|--------------------------------------------------------------------------------------------|------|
| Special Neuropathology – Demyelinating diseases     | 7 screencasts<br>+ 1 script (PDF)<br>+ 1 slide Take Home Messages | 3:14  | 7:17  | 7                         | 1-2-1-1-2-1-1 | MC / open question with short answer / gap text selection / assign the correct answer      | 1.20 |
| Special Neuropathology – Neurodegenerative diseases | 6 screencasts<br>+ 1 script (PDF)<br>+ 1 slide Take Home Messages | 5:13  | 10:14 | 6                         | 1-1-2-1-3-1   | Drag-and-drop / put groups of words in a meaningful order / assign the correct answer / MC | 1.20 |
| Gastrointestinal Tumor Pathology – Liver            | 2 lectures in PPT format                                          | -     | -     | 2                         | 1-1           | MC                                                                                         | 2,0  |
| Urological Tumor Pathology II                       | 3 lectures                                                        | 12:43 | 18:49 | 3                         | 1-1-1         | MC                                                                                         | 1.65 |
| Experimental Pathology                              | 3 lectures                                                        | 5:07  | 25:09 | 2                         | 1-1           | MC                                                                                         | 1.71 |
| Molecular pathology techniques                      | 3 lectures                                                        | 12:47 | 23:29 | 3                         | 1-1-1         | MC                                                                                         | 1.59 |
| Other tumors                                        | 3 lectures                                                        | 3:48  | 25:03 | 3                         | 1-1-1         | MC                                                                                         | 1.5  |
| Hematological neoplasias                            | 3 lectures in PDF Format                                          | -     | -     | 3                         | 1-1-1         | MC                                                                                         | 2.28 |
| Skin tumors                                         | 2 lectures                                                        | 12:19 | 25:36 | 2 + PDF slides (homework) | 1-1           | MC                                                                                         | 1.44 |
| Thoracic tumor pathology                            | 2 lectures                                                        | 16:24 | 22:49 | 1 + PDF slides (homework) | 1             | MC                                                                                         | 1.65 |
| Sarcomas                                            | 2 lectures in PDF Format                                          | -     | -     | 2                         | 1-1           | MC                                                                                         | 2.12 |
| Pediatric pathology/developmental disorders         | 2 lectures in PDF Format                                          | -     | -     | 2                         | 1-1           | MC                                                                                         | 1.73 |
| Death/Autopsy                                       | 2 lectures                                                        | 34:10 | 38:24 | 2                         | 1-1           | MC                                                                                         | 1.33 |

Supplemental Table S2: An example of a lesson-planning outline (neuroendocrine tumors vs. neuroendocrine carcinomas) drafted during the planning of the project phase

|         | Topic                                                                                                                                                                                                                                                                                                                       | Duration (minutes) | Depth of knowledge | Project management | Teamwork  | Scientificity          |
|---------|-----------------------------------------------------------------------------------------------------------------------------------------------------------------------------------------------------------------------------------------------------------------------------------------------------------------------------|--------------------|--------------------|--------------------|-----------|------------------------|
| Seminar | <u>Introductions:</u><br>- Coach<br>- Participants<br>- Short presentation of the course concept<br>- Determination of learning objectives<br>- Clarification of questions                                                                                                                                                  | 15                 |                    |                    | Teamstart |                        |
|         | <u>Review of DigiPath content as it relates to the topic:</u><br>- Questions to the panel concerning basic morphology and general mechanisms of tumorigenesis/metastasis.<br>Coach takes the role of a moderator here, but intervenes as an expert when needed<br>- Systematics of neuroendocrine neoplasms.<br>NET vs. NEC | 30                 | Repetition         |                    |           |                        |
|         |                                                                                                                                                                                                                                                                                                                             | 15                 | Application        |                    |           |                        |
|         | <u>Discussion of the content: What are the issues?</u>                                                                                                                                                                                                                                                                      | 15                 |                    |                    |           | Problem identification |
|         |                                                                                                                                                                                                                                                                                                                             |                    |                    |                    |           |                        |

|          |                                                                                                                                                                                 |    |               |                                        |                           |                                                 |
|----------|---------------------------------------------------------------------------------------------------------------------------------------------------------------------------------|----|---------------|----------------------------------------|---------------------------|-------------------------------------------------|
|          | <ul style="list-style-type: none"> <li>- NET: biomarkers, therapy/prognosis</li> <li>- NEC: biomarkers, therapy/prognosis</li> <li>- - NET vs. NEC: borderline cases</li> </ul> |    |               |                                        |                           |                                                 |
|          | - Distribution of tasks/representations (groups of 2)                                                                                                                           |    |               | Project plan/goals                     |                           |                                                 |
|          | <u>Preparation of papers for 2nd seminar:</u>                                                                                                                                   |    |               |                                        |                           | Information collection                          |
|          | - Where to find information?                                                                                                                                                    | 15 |               |                                        |                           | Where?                                          |
|          | - PubMed                                                                                                                                                                        |    |               |                                        |                           | How? What?                                      |
| Homework | Preparation of presentations for 2nd seminar                                                                                                                                    |    |               |                                        |                           |                                                 |
|          | <u>Presentation and discussion of the presentations:</u>                                                                                                                        |    |               |                                        |                           |                                                 |
|          | - Presentation 1                                                                                                                                                                | 60 |               |                                        | Discussion                |                                                 |
|          | - Presentation 2                                                                                                                                                                |    | Consolidation |                                        |                           | Presentation discussion                         |
| Seminar  | - Presentation 3                                                                                                                                                                |    |               |                                        |                           |                                                 |
|          | - Presentation 4                                                                                                                                                                |    |               |                                        |                           |                                                 |
|          | <u>Determination of group topic (poster topic):</u>                                                                                                                             | 25 |               | Planning refinement                    | Decision                  |                                                 |
|          | - Summary discussion                                                                                                                                                            |    |               |                                        |                           |                                                 |
|          | - Identify and name problem                                                                                                                                                     |    |               |                                        |                           |                                                 |
|          | - What additional information do we need?                                                                                                                                       |    |               |                                        |                           |                                                 |
|          | - Quality characteristics of scientific information                                                                                                                             |    |               |                                        |                           | Literature research                             |
|          | - Designation of a milestone paper by the coach                                                                                                                                 | 5  |               |                                        |                           |                                                 |
| Homework | Working through the milestone paper                                                                                                                                             |    |               |                                        |                           |                                                 |
|          | <u>Journal Club of the Milestone Paper:</u>                                                                                                                                     |    |               |                                        |                           |                                                 |
|          | - How does a journal club work?                                                                                                                                                 |    |               |                                        |                           |                                                 |
|          | - Presentation by the group                                                                                                                                                     |    |               |                                        |                           |                                                 |
|          | - Coach presents key fig., etc.                                                                                                                                                 | 45 |               |                                        |                           |                                                 |
|          | - Discussion                                                                                                                                                                    |    |               |                                        |                           |                                                 |
|          | (weaknesses/strengths/information).                                                                                                                                             |    |               |                                        |                           |                                                 |
|          | <u>Poster design:</u>                                                                                                                                                           |    |               |                                        |                           |                                                 |
| Seminar  | - Basics (how do you make a poster?).                                                                                                                                           | 30 |               |                                        |                           |                                                 |
|          | - What content/statements should be included in our poster?                                                                                                                     |    |               | Decision regarding allocation of tasks |                           | Scientific poster                               |
|          | - Distribution of tasks                                                                                                                                                         | 15 |               |                                        |                           |                                                 |
|          | <u>Formation of two groups of 4, each to select another paper (relevant for poster/presentation in Journal Club), e.g., BreakOut in Zoom</u>                                    |    |               |                                        |                           |                                                 |
| Homework | Select and work through the paper                                                                                                                                               |    |               |                                        |                           |                                                 |
|          | <u>Journal Club of the 2 other papers:</u>                                                                                                                                      | 45 |               |                                        |                           |                                                 |
|          | - Presentation by group                                                                                                                                                         |    |               |                                        |                           |                                                 |
|          | - Discussion                                                                                                                                                                    |    |               |                                        |                           |                                                 |
| Seminar  | - What should be on the poster?                                                                                                                                                 | 45 |               |                                        | Collaborative preparation | Critical evaluation of external scientific data |
|          | Poster design                                                                                                                                                                   |    |               |                                        |                           |                                                 |
| Homework | Delivery of the poster to the course instructor                                                                                                                                 |    |               |                                        |                           |                                                 |
| Seminar  | Discussion of own poster; Discussion of 3 other posters; Reflection                                                                                                             |    |               |                                        | How was it?               | Scientific discourse                            |

Supplemental Table S3: Overall results of long survey

| Results Summer Semester 2020, N=23 | Missing Demography | Results Winter Semester 2020/2021 N= 27 | Missing |
|------------------------------------|--------------------|-----------------------------------------|---------|
|------------------------------------|--------------------|-----------------------------------------|---------|

| Age                                                                                                      |            |   |             |            |   |
|----------------------------------------------------------------------------------------------------------|------------|---|-------------|------------|---|
| <25y                                                                                                     | 21 (95.5%) |   | <25y        | 19 (70.4%) |   |
| 25-30y                                                                                                   | 1 (4.5%)   | 1 | 25-30y      | 8 (29.6%)  | 0 |
| >30y                                                                                                     | 0 (0.0%)   |   | >30y        | 0 (0.0%)   |   |
| Gender                                                                                                   |            |   |             |            |   |
| Male                                                                                                     | 6 (26.1%)  |   | Male        | 5 (18.5%)  |   |
| Female                                                                                                   | 17 (73.9%) | 0 | Female      | 22 (81.5%) | 0 |
| Asynchronous Phase                                                                                       |            |   |             |            |   |
| Course units                                                                                             |            |   |             |            |   |
| Please rate the course section "What is pathology?" in school grades (1-6)                               |            |   |             |            |   |
| 1.47 (0.61)                                                                                              |            | 4 | 1.92 (0.56) |            | 1 |
| Your remarks about the course section "What is pathology?"                                               |            |   |             |            |   |
| <i>Free-text comments</i>                                                                                |            |   |             |            |   |
| Please rate the course section "Morphological basics" in school grades (1-6)                             |            |   |             |            |   |
| 1.63 (1.17)                                                                                              |            | 4 | 1.63 (0.65) |            | 3 |
| Your remarks about the course section "Morphological basics"                                             |            |   |             |            |   |
| <i>Free-text comments</i>                                                                                |            |   |             |            |   |
| Please rate the course section "Atherosclerosis" in school grades (1-6)                                  |            |   |             |            |   |
| 1.28 (0.58)                                                                                              |            | 5 | 1.76 (0.66) |            | 2 |
| Your remarks about the course section "Atherosclerosis"                                                  |            |   |             |            |   |
| <i>Free-text comments</i>                                                                                |            |   |             |            |   |
| Please rate the course section "Inflammation" in school grades (1-6)                                     |            |   |             |            |   |
| 1.71 (0.92)                                                                                              |            | 6 | 2.00 (1.02) |            | 3 |
| Your remarks about the course section "Inflammation"                                                     |            |   |             |            |   |
| <i>Free-text comments</i>                                                                                |            |   |             |            |   |
| Please rate the course section "Immunology" in school grades (1-6)                                       |            |   |             |            |   |
| 1.56 (0.92)                                                                                              |            | 5 | 2.0 (0.71)  |            | 6 |
| Your remarks about the course section "Immunology"                                                       |            |   |             |            |   |
| <i>Free-text comments</i>                                                                                |            |   |             |            |   |
| Please rate the course section "General tumor pathology" in school grades (1-6)                          |            |   |             |            |   |
| 1.41 (0.51)                                                                                              |            | 6 | 1.88 (0.90) |            | 3 |
| Your remarks about the course section "General tumor pathology"                                          |            |   |             |            |   |
| <i>Free-text comments</i>                                                                                |            |   |             |            |   |
| Please rate the course section "Immuno-oncology" in school grades (1-6)                                  |            |   |             |            |   |
| 1.25 (0.45)                                                                                              |            | 7 | 2.00 (1.02) |            | 5 |
| Your remarks about the course section "Immuno-oncology"                                                  |            |   |             |            |   |
| <i>Free-text comments</i>                                                                                |            |   |             |            |   |
| Please rate the course section "Gynecological tumor pathology " in school grades (1-6)                   |            |   |             |            |   |
| 1.78 (0.94)                                                                                              |            | 5 | 3.25 (1.5)  |            | 3 |
| Your remarks about the course section " Gynecological tumor pathology "                                  |            |   |             |            |   |
| <i>Free-text comments</i>                                                                                |            |   |             |            |   |
| Please rate the course section " GI Tumor Pathology - GI " in school grades (1-6)                        |            |   |             |            |   |
| 1.35 (0.49)                                                                                              |            | 6 | 2.29 (0.85) |            | 6 |
| Your remarks about the course section " GI Tumor Pathology - GI "                                        |            |   |             |            |   |
| <i>Free-text comments</i>                                                                                |            |   |             |            |   |
| Please rate the course section " GI Tumor Pathology - Pancreas " in school grades (1-6)                  |            |   |             |            |   |
| 1.41 (0.62)                                                                                              |            | 6 | 2.15 (0.75) |            | 7 |
| Your remarks about the course section " GI Tumor Pathology - Pancreas "                                  |            |   |             |            |   |
| <i>Free-text comments</i>                                                                                |            |   |             |            |   |
| Please rate the course section " Head and neck tumors " in school grades (1-6)                           |            |   |             |            |   |
| 2.29 (1.50)                                                                                              |            | 6 | 2.65 (1.50) |            | 7 |
| Your remarks about the course section " Head and neck tumors "                                           |            |   |             |            |   |
| <i>Free-text comments</i>                                                                                |            |   |             |            |   |
| Please rate the course section " Urological Tumor Pathology I " in school grades (1-6)                   |            |   |             |            |   |
| 1.94 (1.00)                                                                                              |            | 7 | 2.41 (1.01) |            | 5 |
| Your remarks about the course section " Urological Tumor Pathology I "                                   |            |   |             |            |   |
| <i>Free-text comments</i>                                                                                |            |   |             |            |   |
| Please rate the course section " General Neuropathology - Stroke " in school grades (1-6)                |            |   |             |            |   |
| 1.00 (0.00)                                                                                              |            | 4 | 1.24 (0.52) |            | 2 |
| Your remarks about the course section " General Neuropathology - Stroke "                                |            |   |             |            |   |
| <i>Free-text comments</i>                                                                                |            |   |             |            |   |
| Please rate the course section " General Neuropathology - Craniocerebral Trauma " in school grades (1-6) |            |   |             |            |   |
| 1.00 (0.00)                                                                                              |            | 4 | 1.17 (0.38) |            | 3 |
| Your remarks about the course section "General Neuropathology - Craniocerebral Trauma "                  |            |   |             |            |   |
| <i>Free-text comments</i>                                                                                |            |   |             |            |   |
| Please rate the course section " General Neuropathology - Infections " in school grades (1-6)            |            |   |             |            |   |

|                                                                                                                              |   |             |   |
|------------------------------------------------------------------------------------------------------------------------------|---|-------------|---|
| 1.00 (0.00)                                                                                                                  | 4 | 1.25 (0.53) | 3 |
| Your remarks about the course section " General Neuropathology - Infections "                                                |   |             |   |
| <i>Free-text comments</i>                                                                                                    |   |             |   |
| Please rate the course section " General Neuropathology - Brain Tumors " in school grades (1-6)                              |   |             |   |
| 1.00 (0.00)                                                                                                                  | 4 | 1.21 (0.51) | 3 |
| Your remarks about the course section " General Neuropathology - Brain Tumors "                                              |   |             |   |
| <i>Free-text comments</i>                                                                                                    |   |             |   |
| Please rate the course section " Special Neuropathology - Maldevelopments & Developmental Disorders " in school grades (1-6) |   |             |   |
| 1.11 (0.32)                                                                                                                  | 5 | 1.33 (0.57) | 3 |
| Your remarks about the course section " Special Neuropathology - Maldevelopments & Developmental Disorders "                 |   |             |   |
| <i>Free-text comments</i>                                                                                                    |   |             |   |
| Please rate the course section " Special Neuropathology - Metabolic Disorders " in school grades (1-6)                       |   |             |   |
| 1.20 (0.41)                                                                                                                  | 3 | 1.22 (0.52) | 4 |
| Your remarks about the course section " Special Neuropathology - Metabolic Disorders "                                       |   |             |   |
| <i>Free-text comments</i>                                                                                                    |   |             |   |
| Please rate the course section " Special Neuropathology - Demyelinating Diseases " in school grades (1-6)                    |   |             |   |
| 1.20 (0.41)                                                                                                                  | 3 | 1.22 (0.52) | 4 |
| Your remarks about the course section " Special Neuropathology - Demyelinating Diseases "                                    |   |             |   |
| <i>Free-text comments</i>                                                                                                    |   |             |   |
| Please rate the course section " Special Neuropathology - Neurodegenerative Diseases " in school grades (1-6)                |   |             |   |
| 1.20 (0.41)                                                                                                                  | 3 | 1.21 (0.51) | 3 |
| Your remarks about the course section " Special Neuropathology - Neurodegenerative Diseases "                                |   |             |   |
| <i>Free-text comments</i>                                                                                                    |   |             |   |
| Please rate the course section " Molecular pathology techniques " in school grades (1-6)                                     |   |             |   |
| 1.59 (0.71)                                                                                                                  | 6 | 2.26 (0.99) | 8 |
| Your remarks about the course section " Molecular pathology techniques "                                                     |   |             |   |
| <i>Free-text comments</i>                                                                                                    |   |             |   |
| Please rate the course section " Experimental Pathology " in school grades (1-6)                                             |   |             |   |
| 1.71 (0.77)                                                                                                                  | 6 | 2.61 (0.98) | 9 |
| Your remarks about the course section " Experimental Pathology "                                                             |   |             |   |
| <i>Free-text comments</i>                                                                                                    |   |             |   |
| Please rate the course section " Gastrointestinal Tumor Pathology - Liver " in school grades (1-6)                           |   |             |   |
| 2.00 (1.09)                                                                                                                  | 5 | 2.45 (1.45) | 7 |
| Your remarks about the course section " Gastrointestinal Tumor Pathology - Liver "                                           |   |             |   |
| <i>Free-text comments</i>                                                                                                    |   |             |   |
| Please rate the course section " Urological Tumor Pathology II " in school grades (1-6)                                      |   |             |   |
| 1.65 (0.86)                                                                                                                  | 6 | 2.39 (1.24) | 9 |
| Your remarks about the course section " Urological Tumor Pathology II "                                                      |   |             |   |
| <i>Free-text comments</i>                                                                                                    |   |             |   |
| Please rate the course section " Other tumors " in school grades (1-6)                                                       |   |             |   |
| 1.50 (0.52)                                                                                                                  | 7 | 2.33 (1.03) | 9 |
| Your remarks about the course section " Other tumors "                                                                       |   |             |   |
| <i>Free-text comments</i>                                                                                                    |   |             |   |
| Please rate the course section " Hematological neoplasias " in school grades (1-6)                                           |   |             |   |
| 2.28 (1.53)                                                                                                                  | 5 | 2.15 (0.99) | 7 |
| Your remarks about the course section " Hematological neoplasias "                                                           |   |             |   |
| <i>Free-text comments</i>                                                                                                    |   |             |   |
| Please rate the course section " Thoracic tumor pathology " in school grades (1-6)                                           |   |             |   |
| 1.65 (0.61)                                                                                                                  | 6 | 2.30 (0.92) | 7 |
| Your remarks about the course section " Thoracic tumor pathology "                                                           |   |             |   |
| <i>Free-text comments</i>                                                                                                    |   |             |   |
| Please rate the course section " skin tumors " in school grades (1-6)                                                        |   |             |   |
| 1.44 (0.63)                                                                                                                  | 7 | 2.37 (1.01) | 8 |
| Your remarks about the course section " skin tumors "                                                                        |   |             |   |
| <i>Free-text comments</i>                                                                                                    |   |             |   |
| Please rate the course section " Sarcomas " in school grades (1-6)                                                           |   |             |   |
| 2.12 (1.32)                                                                                                                  | 6 | 2.32 (1.16) | 8 |
| Your remarks about the course section " Sarcomas "                                                                           |   |             |   |
| <i>Free-text comments</i>                                                                                                    |   |             |   |
| Please rate the course section " Pediatric pathology/development disorders " in school grades (1-6)                          |   |             |   |
| 1.73 (1.22)                                                                                                                  | 8 | 2.35 (0.88) | 7 |
| Your remarks about the course section " Pediatric pathology/development disorders "                                          |   |             |   |
| <i>Free-text comments</i>                                                                                                    |   |             |   |
| Please rate the course section " Death/Autopsy " in school grades (1-6)                                                      |   |             |   |

|                                                                                                                                                                    |            |              |            |
|--------------------------------------------------------------------------------------------------------------------------------------------------------------------|------------|--------------|------------|
| 1.33 (0.62)                                                                                                                                                        | 8          | 2.17 (0.72)  | 15         |
| Your remarks about the course section " Death/Autopsy "                                                                                                            |            |              |            |
| <i>Free-text comments</i>                                                                                                                                          |            |              |            |
| Course usability                                                                                                                                                   |            |              |            |
| I find it easy to use the AllPathOn course. (1= do not agree at all, 5 = fully agree).                                                                             |            |              |            |
| 4.77 (0.69)                                                                                                                                                        | 1          | 4.38 (0.88)  | 3          |
| The structure of the AllPathOn course is clear. (1= do not agree at all, 5 = fully agree).                                                                         |            |              |            |
| 4.64 (0.90)                                                                                                                                                        | 1          | 4.52 (0.73)  | 4          |
| Whenever I make a mistake while using this system, the system makes it easy for me to get back to where I wanted to go. (1= do not agree at all, 5 = fully agree). |            |              |            |
| 4.59 (0.85)                                                                                                                                                        | 1          | 4.05 (1.13)  | 5          |
| No problems were encountered when using the AllPathOn course. (1= do not agree at all, 5 = fully agree).                                                           |            |              |            |
| 3.82 (1.05)                                                                                                                                                        | 1          | 3.78 (1.72)  | 0          |
| If any problems have occurred during use, please describe them briefly.                                                                                            |            |              |            |
| <i>Free-text comments</i>                                                                                                                                          |            |              |            |
| Course format                                                                                                                                                      |            |              |            |
| I missed the direct interaction in class with the lecturers for a better understanding of the course. (1= do not agree at all, 5 = fully agree).                   |            |              |            |
| 2.81 (1.44)                                                                                                                                                        | 2          | 3.04 (1.34)  | 0          |
| The screencasts (PowerPoint slides with voice-over) were a suitable format. (1= do not agree at all, 5 = fully agree).                                             |            |              |            |
| 4.55 (0.74)                                                                                                                                                        | 1          | 4.22 (1.09)  | 0          |
| The lecture recordings were a suitable format. (1= do not agree at all, 5 = fully agree).                                                                          |            |              |            |
| 3.79 (1.18)                                                                                                                                                        | 4          | 4.13 (1.23)  | 3          |
| The animated videos were a suitable format. (1= do not agree at all, 5 = fully agree).                                                                             |            |              |            |
| 4.63 (0.60)                                                                                                                                                        | 4          | 4.63 (0.84)  | 0          |
| Course conception and structure                                                                                                                                    |            |              |            |
| The learning objectives are presented in a comprehensible manner. (1= do not agree at all, 5 = fully agree).                                                       |            |              |            |
| 4.14 (1.20)                                                                                                                                                        | 2          | 3.26 (1.20)  | 0          |
| The learning content follows a common thread and builds on itself well. (1= do not agree at all, 5 = fully agree).                                                 |            |              |            |
| 4.14 (0.96)                                                                                                                                                        | 2          | 3.15 (1.03)  | 0          |
| Course content                                                                                                                                                     |            |              |            |
| The information provided in the AllPathOn course are clear. (1= do not agree at all, 5 = fully agree).                                                             |            |              |            |
| 4.24 (1.04)                                                                                                                                                        | 2          | 3.60 (0.91)  | 2          |
| I was able to clarify my remaining questions. (1= do not agree at all, 5 = fully agree).                                                                           |            |              |            |
| 4.08 (1.08)                                                                                                                                                        | 11         | 3.67 (1.37)  | 9          |
| How did you resolve the remaining questions?                                                                                                                       |            |              |            |
| E-Mail                                                                                                                                                             | 2 (15.4%)  | E-Mail       | 1 (4.5%)   |
| Telephone                                                                                                                                                          | 1 (0.0%)   | Telephone    | 0 (0.0%)   |
| Internet                                                                                                                                                           | 8 (61.5%)  | Internet     | 6 (27.3%)  |
| Books                                                                                                                                                              | 4 (30.8%)  | Books        | 5 (22.7%)  |
| Fellow                                                                                                                                                             |            | Fellow       |            |
| Students                                                                                                                                                           | 5 (38.5%)  | students     | 7 (31.8%)  |
| Other                                                                                                                                                              | 2 (15.4%)  | Other        | 2 (9.0%)   |
| The online activities in this course were associated with clear tasks and objectives. (1= do not agree at all, 5 = fully agree). Asked in summer semester only.    |            |              |            |
| 4.21 (0.86)                                                                                                                                                        | 4          | N/A          |            |
| I had difficulty answering the questions asked. (1= do not agree at all, 5 = fully agree). Asked in summer semester only.                                          |            |              |            |
| 1.74 (0.99)                                                                                                                                                        | 4          | N/A          |            |
| I did not understand the following topics correctly:                                                                                                               |            |              |            |
| <i>Free-text comments</i>                                                                                                                                          |            |              |            |
| Requirement and demand:                                                                                                                                            |            |              |            |
| The amount of time required was...                                                                                                                                 |            |              |            |
| Far too high                                                                                                                                                       | 1 (4.5%)   | Far too high | 2 (7.4%)   |
| Too high                                                                                                                                                           | 1 (4.5%)   | Too high     | 13 (48.1%) |
| Appropriate                                                                                                                                                        | 19 (86.4%) | Appropriate  | 12 (44.4%) |
| Too low                                                                                                                                                            | 1 (4.5%)   | Too low      | 0 (0.0%)   |
| Far too low                                                                                                                                                        | 0 (0.0%)   | Far too low  | 0 (0.0%)   |
| The number of teaching topics was...                                                                                                                               |            |              |            |
| Far too high                                                                                                                                                       | 0 (0.0%)   | Far too high | 9 (33.3%)  |
| Too high                                                                                                                                                           | 4 (19.0%)  | Too high     | 12 (44.4%) |
| Appropriate                                                                                                                                                        | 17 (80.7%) | Appropriate  | 6 (22.2%)  |
| low                                                                                                                                                                | 0 (0.0%)   | Too low      | 0 (0.0%)   |
| Far too low                                                                                                                                                        | 0 (0.0%)   | Far too low  | 0 (0.0%)   |
| How much time did you spend completing the course online per week?                                                                                                 |            |              |            |

|                                                                                                                                                              |            |   |             |            |    |
|--------------------------------------------------------------------------------------------------------------------------------------------------------------|------------|---|-------------|------------|----|
| <1h                                                                                                                                                          | 1 (4.5%)   |   | <1h         | 0 (0.0%)   |    |
| 1-5h                                                                                                                                                         | 14 (63.6%) |   | 1-5h        | 3 (11.5%)  |    |
| 6-10h                                                                                                                                                        | 6 (27.3%)  | 1 | 6-10h       | 6 (23.1%)  | 1  |
| 11-15h                                                                                                                                                       | 1 (4.5%)   |   | 11-15h      | 8 (30.8%)  |    |
| 16-20h                                                                                                                                                       | 0 (0.0%)   |   | 16-20h      | 6 (23.1%)  |    |
| >20h                                                                                                                                                         | 0 (0.0%)   |   | >20h        | 3 (11.5%)  |    |
| How much time did you spend doing additional research on the topics offered in the course?                                                                   |            |   |             |            |    |
| <1h                                                                                                                                                          | 15 (71.4%) |   | <1h         | 6 (24.0%)  |    |
| 1-5h                                                                                                                                                         | 5 (23.8%)  |   | 1-5h        | 14 (56.0%) |    |
| 6-10h                                                                                                                                                        | 0 (0.0%)   | 2 | 6-10h       | 3 (12.0%)  | 2  |
| 11-15h                                                                                                                                                       | 1 (4.8%)   |   | 11-15h      | 0 (0.0%)   |    |
| 16-20h                                                                                                                                                       | 0 (0.0%)   |   | 16-20h      | 1 (4.0%)   |    |
| >20h                                                                                                                                                         | 0 (0.0%)   |   | >20h        | 1 (4.0%)   |    |
| Supervision by the lecturers                                                                                                                                 |            |   |             |            |    |
| If found that the lecturers were easily contactable. (1= do not agree at all, 5 = fully agree).                                                              |            |   |             |            |    |
| 4.83 (0.41)                                                                                                                                                  | 17         |   | 4.00 (1.25) |            | 12 |
| I was able to clarify all the questions. (1= do not agree at all, 5 = fully agree).                                                                          |            |   |             |            |    |
| 4.67 (0.71)                                                                                                                                                  | 14         |   | 3.92 (1.44) |            | 14 |
| The weekly Q&A session has contributed to a better understanding of the content. (1= do not agree at all, 5 = fully agree). (Asked in summer semester only.) |            |   |             |            |    |
| 3.14 (1.86)                                                                                                                                                  | 16         |   | N/A         |            |    |
| Learning success                                                                                                                                             |            |   |             |            |    |
| I understood the course content. (1= do not agree at all, 5 = fully agree).                                                                                  |            |   |             |            |    |
| 3.95 (1.24)                                                                                                                                                  | 2          |   | 3.16 (1.11) |            | 2  |
| I feel confident in handling the course content. (1= do not agree at all, 5 = fully agree).                                                                  |            |   |             |            |    |
| 3.30 (1.38)                                                                                                                                                  | 3          |   | 2.52 (1.05) |            | 2  |
| Overall Satisfaction                                                                                                                                         |            |   |             |            |    |
| I enjoyed attending the course. (1= do not agree at all, 5 = fully agree).                                                                                   |            |   |             |            |    |
| 3.59 (1.02)                                                                                                                                                  | 0          |   | 3.23 (1.31) |            | 1  |
| I am motivated to continue to explore pathology topics in my studies. (1= do not agree at all, 5 = fully agree).                                             |            |   |             |            |    |
| 4.04 (0.88)                                                                                                                                                  | 0          |   | 3.15 (1.16) |            | 1  |
| How would you rate the AllPathOn course in general? (1= worst, 5= best)                                                                                      |            |   |             |            |    |
| 4.32 (1.21)                                                                                                                                                  | 1          |   | 3.67 (1.13) |            | 3  |
| Were there any course days that you felt should be improved, why?                                                                                            |            |   |             |            |    |
| Free-text comments                                                                                                                                           |            |   |             |            |    |
| Were there any course days that you sectionicularly enjoyed, why?                                                                                            |            |   |             |            |    |
| Free-text comments                                                                                                                                           |            |   |             |            |    |
| What did you sectionicularly like in general?                                                                                                                |            |   |             |            |    |
| Free-text comments                                                                                                                                           |            |   |             |            |    |
| In your view, what could be improved about the course in general?                                                                                            |            |   |             |            |    |
| Free-text comments                                                                                                                                           |            |   |             |            |    |
| Flipped Classroom Phase                                                                                                                                      |            |   |             |            |    |
| Requirements                                                                                                                                                 |            |   |             |            |    |
| The task was completely clear to me. (1= do not agree at all, 5 = fully agree).                                                                              |            |   |             |            |    |
| N/A                                                                                                                                                          |            |   | 3.82 (0.96) |            | 0  |
| I found the group size to be appropriate. (1= do not agree at all, 5 = fully agree).                                                                         |            |   |             |            |    |
| N/A                                                                                                                                                          |            |   | 4.81 (0.49) |            | 1  |
| How much time did you spend on preparation and post-work during the group work phase?                                                                        |            |   |             |            |    |
|                                                                                                                                                              |            |   | <1h         | 0 (0.0%)   |    |
|                                                                                                                                                              |            |   | 1-5h        | 7 (25.9%)  |    |
| N/A                                                                                                                                                          |            |   | 6-10h       | 8 (29.6%)  | 0  |
|                                                                                                                                                              |            |   | 11-15h      | 8 (29.6%)  |    |
|                                                                                                                                                              |            |   | 16-20h      | 3 (11.1%)  |    |
|                                                                                                                                                              |            |   | >20h        | 1 (3.7%)   |    |
| I found the amount of work to be reasonable. (1= do not agree at all, 5 = fully agree).                                                                      |            |   |             |            |    |
| N/A                                                                                                                                                          |            |   | 4.56 (0.70) |            | 0  |
| Group atmosphere                                                                                                                                             |            |   |             |            |    |
| There was a good working atmosphere in the group. (1= do not agree at all, 5 = fully agree).                                                                 |            |   |             |            |    |
| N/A                                                                                                                                                          |            |   | 4.74 (0.71) |            | 0  |
| The contact ban in force at the time of the group work phase has affected the cooperation. (1= do not agree at all, 5 = fully agree).                        |            |   |             |            |    |
| N/A                                                                                                                                                          |            |   | 2.67 (1.33) |            | 0  |
| The pandemic-related contact ban made communication difficult. (1= do not agree at all, 5 = fully agree).                                                    |            |   |             |            |    |
| N/A                                                                                                                                                          |            |   | 2.63 (1.39) |            | 0  |
| Supervision by lecturers                                                                                                                                     |            |   |             |            |    |
| How satisfied were you with the support you received from the lecturer? (1= worst, 5 = best)                                                                 |            |   |             |            |    |

|                                                                                                                                       |             |   |
|---------------------------------------------------------------------------------------------------------------------------------------|-------------|---|
| N/A                                                                                                                                   | 4.89 (0.32) | 0 |
| The lecturer was available to answer questions and provide further assistance as needed. (1= do not agree at all, 5 = fully agree).   |             |   |
| N/A                                                                                                                                   | 5.00 (0.00) | 0 |
| The lecturer responded sufficiently to questions and suggestions from the students. (1= do not agree at all, 5 = fully agree).        |             |   |
| N/A                                                                                                                                   | 5.00 (0.00) | 0 |
| The lecturer formulated criticism in a fair and constructive way. (1= do not agree at all, 5 = fully agree).                          |             |   |
| N/A                                                                                                                                   | 4.96 (0.19) | 0 |
| Learning gain                                                                                                                         |             |   |
| How would you rate your learning gains in terms of your ability to work scientifically? (1= no gain, 5 = very high)                   |             |   |
| N/A                                                                                                                                   | 4.15 (0.97) | 0 |
| How would you rate your learning gains in terms of your ability to search relevant scientific literature? (1= no gain, 5 = very high) |             |   |
| N/A                                                                                                                                   | 4.26 (0.81) | 0 |
| How would you rate your learning gain in being able to critically reflect on scientific content? (1= no gain, 5 = very high)          |             |   |
| N/A                                                                                                                                   | 4.37 (0.74) | 0 |
| How would you rate your learning gain in being able to work in a team? (1= no gain, 5 = very high)                                    |             |   |
| N/A                                                                                                                                   | 3.52 (0.94) | 0 |
| How would you rate your learning gain in terms of planning and implementing science projects? (1= no gain, 5 = very high)             |             |   |
| N/A                                                                                                                                   | 3.82 (1.00) | 0 |
| How would you rate your learning gain in terms of your ability to develop scientific posters? (1= no gain, 5 = very high)             |             |   |
| N/A                                                                                                                                   | 4.41 (0.57) | 0 |
| The pandemic contact ban affected my learning gain. (1= do not agree at all, 5 = fully agree).                                        |             |   |
| N/A                                                                                                                                   | 2.63 (1.47) | 0 |
| Overall results of the Flipped Classroom Phase                                                                                        |             |   |
| How satisfied were you with the result of your group work (school grades)                                                             |             |   |
| N/A                                                                                                                                   | 1.30 (0.47) | 0 |
| The pandemic-related ban on contact affected the outcome of group work. (1= do not agree at all, 5 = fully agree).                    |             |   |
| N/A                                                                                                                                   | 2.26 (1.26) | 0 |
| The group work increased my interest in pathology. (1= do not agree at all, 5 = fully agree).                                         |             |   |
| N/A                                                                                                                                   | 4.04 (1.02) | 0 |
| The group work phase increased my interest in scientific work. (1= do not agree at all, 5 = fully agree).                             |             |   |
| N/A                                                                                                                                   | 3.93 (1.14) | 0 |
| How would you rate the group phase overall? (school grades)                                                                           |             |   |
| N/A                                                                                                                                   | 1.44 (0.51) | 0 |
| What do you find sectionicularly successful with regard to the group phase?                                                           |             |   |
| Free-text comments                                                                                                                    |             |   |
| What suggestions do you have for improvement?                                                                                         |             |   |
| Free-text comments                                                                                                                    |             |   |

Supplemental Table S4: Overall results of short survey (section of general semester evaluation).

| Results Summer Semester 2020,<br>N=29                            |            | Missing | Results Winter Semester 2020/2021 N= 68 |            | Missing |
|------------------------------------------------------------------|------------|---------|-----------------------------------------|------------|---------|
| Please grade the course with a school grade                      |            |         |                                         |            |         |
| 1.56 (0.85)                                                      |            | 2       | 2.32 (1.16)                             |            | 0       |
| The content of the course was presented in a comprehensible way. |            |         |                                         |            |         |
| 1.30 (0.46)                                                      |            | 2       | 2.31 (1.11)                             |            | 0       |
| How much time did you spend working on the course overall?       |            |         |                                         |            |         |
| <5h                                                              | 0 (0.0%)   |         | <5h                                     | 3 (4.4%)   |         |
| 5-9h                                                             | 1 (3.6%)   |         | 5-9h                                    | 8 (11.8%)  |         |
| 10-14h                                                           | 3 (10.7%)  | 1       | 10-14h                                  | 6 (8.8%)   | 0       |
| 15-25h                                                           | 4 (14.3%)  |         | 15-25h                                  | 15 (22.1%) |         |
| >25h                                                             | 20 (71.4%) |         | >25h                                    | 36 (52.9%) |         |
| The scope of the course was appropriate.                         |            |         |                                         |            |         |



|                                  |   |             |   |
|----------------------------------|---|-------------|---|
| 1.57 (0.68)                      | 1 | 2.49 (1.29) | 1 |
| Do you have any further remarks? |   |             |   |
| <i>Free-text comments</i>        |   |             |   |
